# Supplementary material for: Physiological roles of Casparian strips and suberin in the transport of water and solutes
Source: PubMed Central journal article supplement — New Phytol. 2021 Oct 21;232(6):2295–307. doi: 10.1111/nph.17765 (PMC9298204; doi:10.1111/nph.17765), 2021-10-21
Supplement: NPH-232-2295-s001.pdf [file NPH-232-2295-s001.pdf]

## **New Phytologist Supporting Information**

Article title: Physiological roles of Casparian strips and suberin in the transport of water and solutes.

Authors: Monica Calvo-Polanco, Zoe Ribeyre, Myriam Dauzat, Guilhem Reyt, Christopher Hidalgo-Shrestha, Patrick Diehl, Marc Frenger, Thierry Simonneau, Bertrand Muller, David E Salt, Rochus B Franke, Christophe Maurel, Yann Boursiac

Article acceptance date: 02 August 2021

The following Supporting Information is available for this article:

**Fig. S1** Initial characterization of new enhanced suberin mutants. Screening of insertion mutants and suberin monomer analysis.

**Fig. S2** Propidium iodide penetration in the root of CS and suberin mutants.

**Fig. S3** Deconvolution of the Auramine O signal in 21d hydroponically grown plants enables the detection and quantification of endodermal and peridermal suberin.

**Fig. S4** Correlations between root hydraulic conductivity ( $L_{p_{r-h}}$ ) and PIP aquaporins expression levels.

**Fig. S5** Effect of NaCl on the root hydraulic conductivity ( $L_{p_{r-h}}$ ) of Col-0 and of a collection of 16 CS and suberin mutants.

**Fig. S6** Kinetics of rosette development and transpiration rates in Col-0 and in a selection of CS and suberin mutants.

**Table S1** Table summarizing the different mutants analyzed in the present study.

**Table S2** Ionic comparisons of the shoots of CS and suberin deficient mutants.

**Fig S1** Initial characterization of new enhanced suberin mutants. Screening of insertion mutants and suberin monomer analysis.

- (a) eFP visualization of the root expression pattern of the GDSL-like lipase/hydrolase gene *GELP51* (*At2g23540*). Display of absolute expression values for *GELP51* in the root. Consistent with a putative function on root suberization *GELP51* is predominantly expressed in the endodermis. Data and graphics were extracted from the Arabidopsis Translatome eFP Browser available at <http://bar.utoronto.ca> (Mustroph et al., 2009).
- (b) Schematic drawing of the *GELP51* locus (*At2g23540*) with indicated T-DNA insertion positions of available mutant line's (GK\_016A11, *gelp51-2*; SALK\_033359, *gelp51-1*).
- (c) Semi-quantitative RT-PCR on the GK\_016A11 line, SALK\_033359 line and on Col-0 plants for *GELP51* transcript levels in roots. *ACTIN* was used as internal control. Line GK\_016A11, now named *gelp51-2*, was selected for further analysis.
- (d) GC-MS quantification of the suberin monomer profiles of *gelp51-2* and wildtype Col-0 roots following delipidation and depolymerization according to Franke et al., 2005. The *gelp51-2* mutant is substantially increased in the predominant suberin monomers. The total suberin content in *gelp51-1* is 39% higher compared to the wildtype (Figure 1)<sup>1</sup>.  $\omega$ -OH-Acids,  $\omega$ -Hydroxyacids;  $\alpha,\omega$ -Diacids,  $\alpha,\omega$ -Dicarboxylic acids. Data are means  $\pm$  SD, n=6. Significances relative to wildtype (t-test, \*P<0.05, \*\*P<0.01).
- (e) eFP visualization of the root expression pattern of the NAC-like transcription factor gene *ANAC038* (*At2g24430*). Display of absolute expression values for *ANAC038* in the root. Consistent with a putative function on root suberization *ANAC038* is predominantly expressed in the endodermis. Data and graphics were extracted from the Arabidopsis Translatome eFP Browser.
- (f) Schematic drawing of the *ANAC038* locus (*At2g24430*) with indicated T-DNA insertion positions of available mutant line's with the selected mutant line's (GK\_890E11; FLAG\_335C06; SAIL\_784G11; SALK\_103716, *anac038-1*; WiscDsLox\_HS007-11H, *anac038-2*).
- (g) Semi-quantitative RT-PCR screening on the insertion lines FLAG\_335C06, GK\_890E11, SAIL\_784G11, SALK\_103716, WiscDsLox\_HS007-11H and on Col-0 plants for *ANAC038* transcript levels in roots. *ACTIN* was used as internal control. Lines FLAG\_335C06, GK\_890E11 and SAIL\_784G11 did not show any significant changes in *ANAC038* expression levels. Mutant lines SALK\_103716, now named *anac038-1*, and WiscDsLox\_HS007-11H, now named *anac038-2*, were characterized as transcriptional knock-out mutants and selected for subsequent suberin analysis by GC-MS.

(h) GC-MS quantification of the suberin monomer profiles of *anac038-1* and wildtype Col-0 roots as in (d). The *anac038-1* mutant is significantly increased in all aliphatic suberin monomers. The total suberin content in *anac038-1* is 31% higher compared to the wildtype (Figure 1C). The *anac038-2* mutant from the WiscDsLox T-DNA collection showed a very similar increased suberin phenotype<sup>2</sup>. As the majority of the mutants used in this study were from the SALK collection, *anac038-1* was selected for the physiological studies.  $\omega$ -OH-Acids,  $\omega$ -Hydroxyacids;  $\alpha,\omega$ -Diacids,  $\alpha,\omega$ -Dicarboxylic acids. Data are means  $\pm$  SD, n=6. Significances relative to wildtype (t-test, \*P<0.05, \*\*P<0.01).

(i) GC-MS quantification of the suberin monomer profiles of *anac038-2* and wildtype Col-0 roots as in (D). The *anac038-2* mutant is significantly increased in the all suberin monomers. The total suberin content in *anac038-2* is 43% higher compared to the wildtype (Figure 1C). The *anac038-2* mutant is from the WiscDsLox T-DNA collection (Woody et al., 2006). As the majority of the mutants used in this study were from the SALK collection, *anac038-2* was not included in all studies.  $\omega$ -OH-Acids,  $\omega$ -Hydroxyacids;  $\alpha,\omega$ -Diacids,  $\alpha,\omega$ -Dicarboxylic acids. Data are means  $\pm$  SD, n=4. Significances relative to wildtype (t-test, \*P<0.05, \*\*P<0.01).

<sup>1</sup> Albeit endodermis specific GELP51 expression, GELP51 co-oexpression with known suberin genes and the enhanced root suberin content in the line GK\_016A11 we do not want to claim that these data are prove for GELP51 being required for suberin formation. It is relevant for this study that line GK\_016A11, named *gelp51-2*, consistently shows an enhanced root suberin content. An in-depth characterization of these mutants and the mutated genes will be published separately.

<sup>2</sup> An in-depth characterization of these mutants and the mutated genes will be published separately.

Primers:

For semiquantitative RT-PCR of *GELP51*:

LS832 GGCGGATTAGGAGCTTCTTT

LS833 AACAAGCCTTTGTCGCACTT

For semiquantitative RT-PCR of *ANA038*:

LS908 CGAAAATGGGAGGAAAAGAA

LS839 CGCCATTGTACGAAGCACTA

## *At2g23540 (GELP51)*

(a)

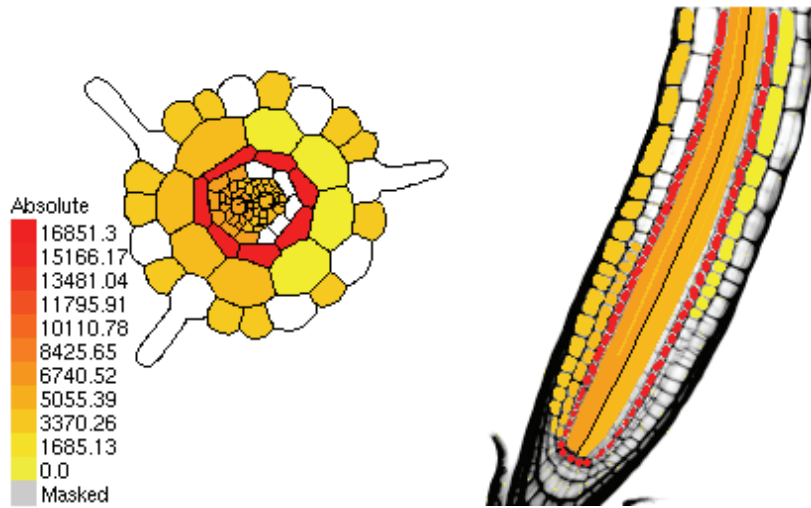

(b)

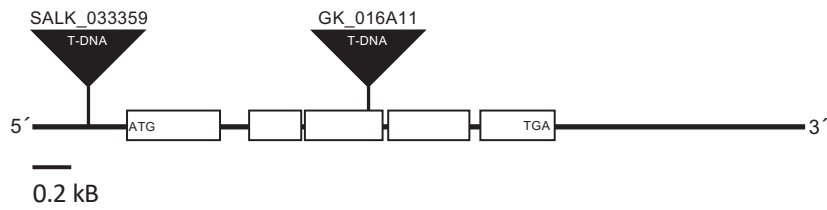

(c)

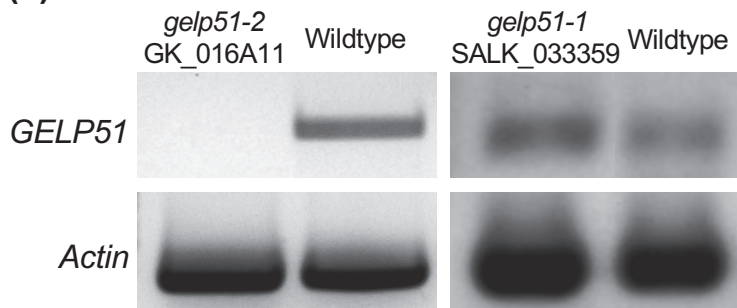

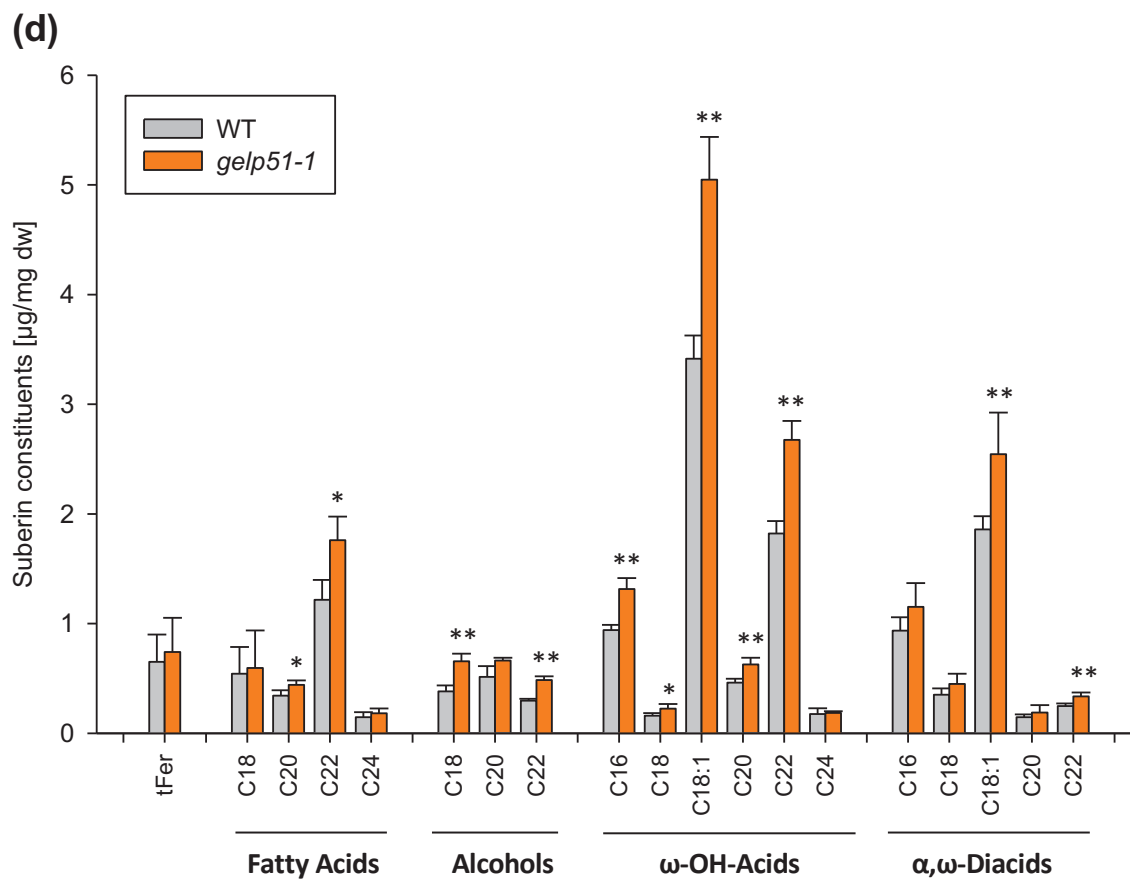

**At2g24430 (ANAC038)**

(e)

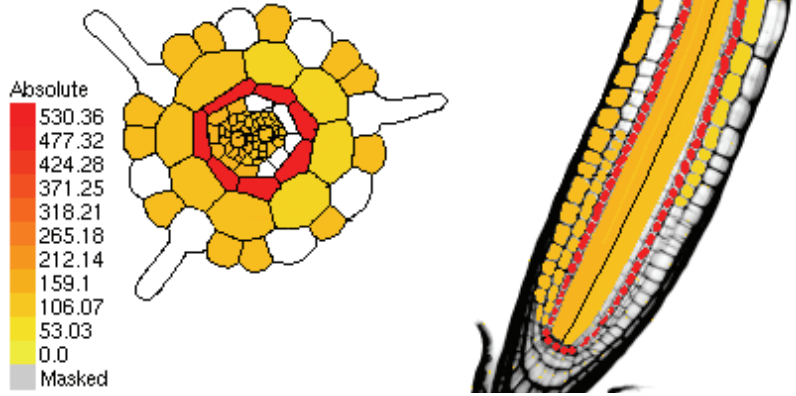

(f)

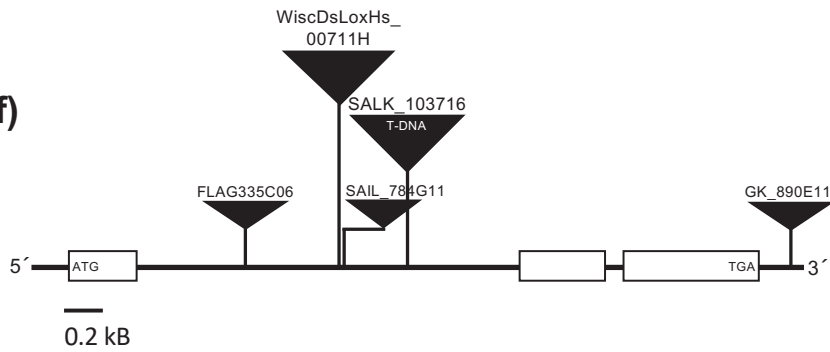

(g)

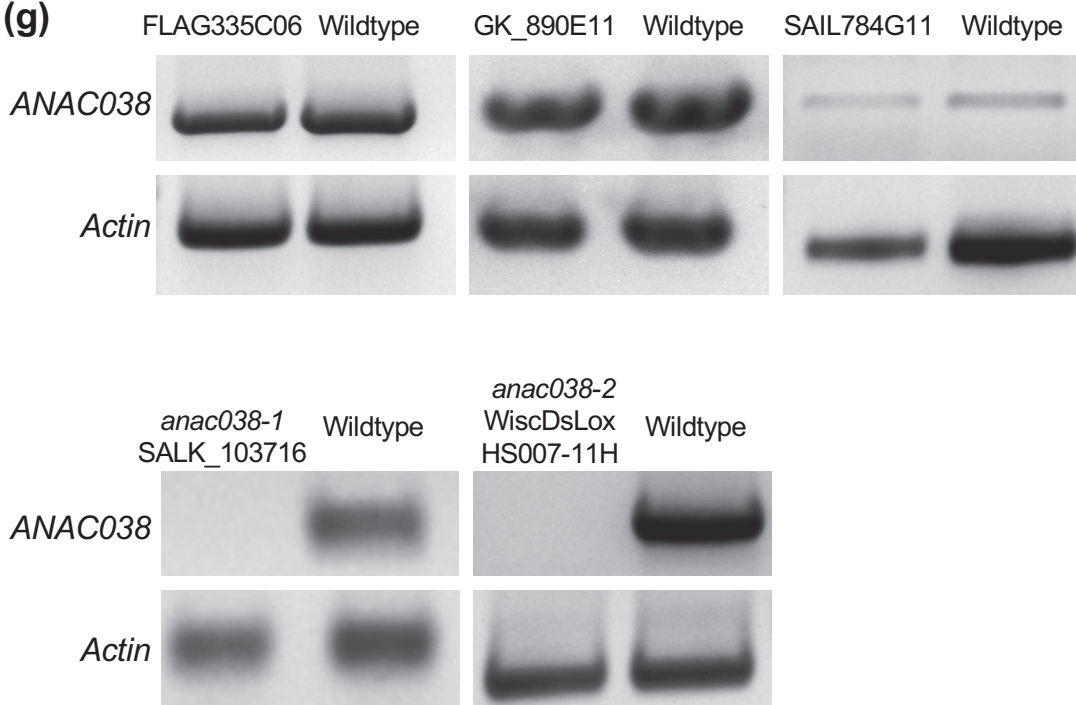

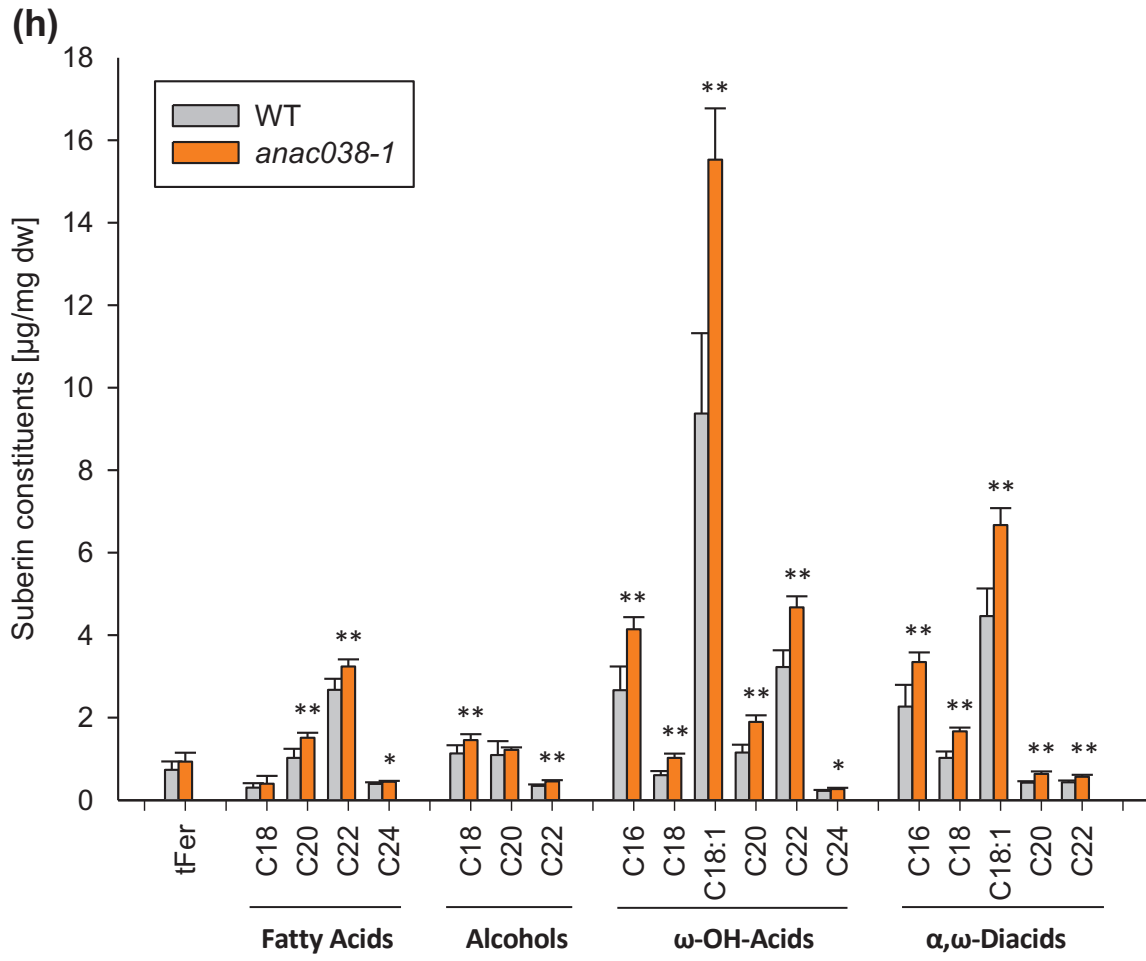

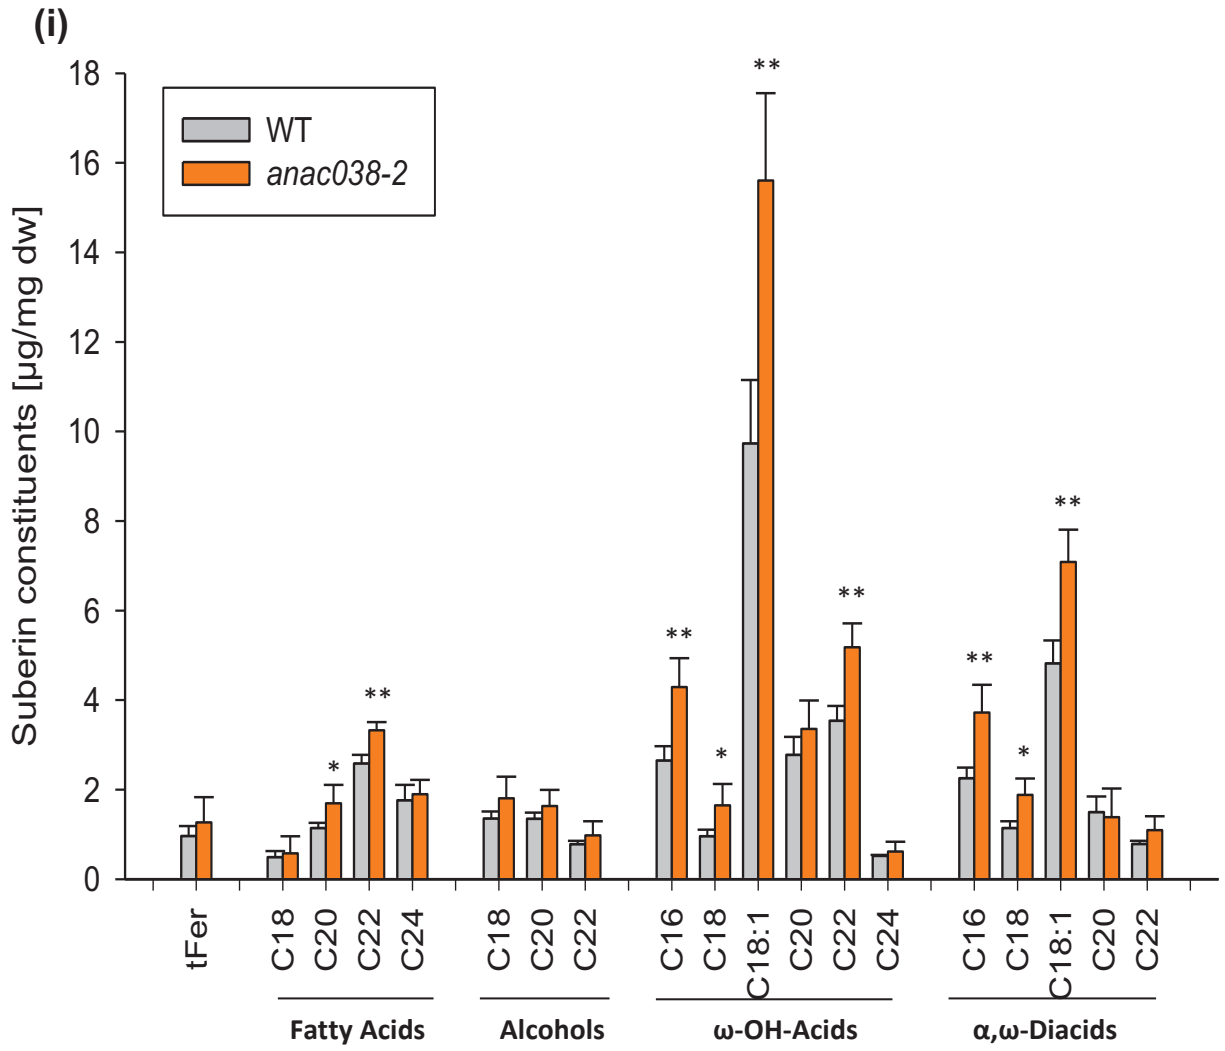



**Fig. S2** Propidium iodide penetration in the root of CS and suberin mutants. Confocal cross-section of PI stained 21 days-old plants at various locations along the root, as indicated in Figure 1a. Asterisks mark the staining of the xylem vessels after penetration of the PI into the stele. In magenta: primary root. In red: lateral roots. One representative image is shown,  $n \geq 3$ . Scale bar = 50 $\mu$ m. Method: 21 days-old plants cultivated for 10 days in vitro and then 11 days in hydroponics were incubated for 1h in 2ml of 1/1000 propidium iodide in hydroponic solution. Cross-sections were reconstructed from Leica SP8 confocal z-stack images. Imaging parameters were identical for all images: 40x water objective, excitation: 633nm from HeNe laser with z-correction 2-8% intensity, emission: 723-730nm.

PRIMARY ROOT

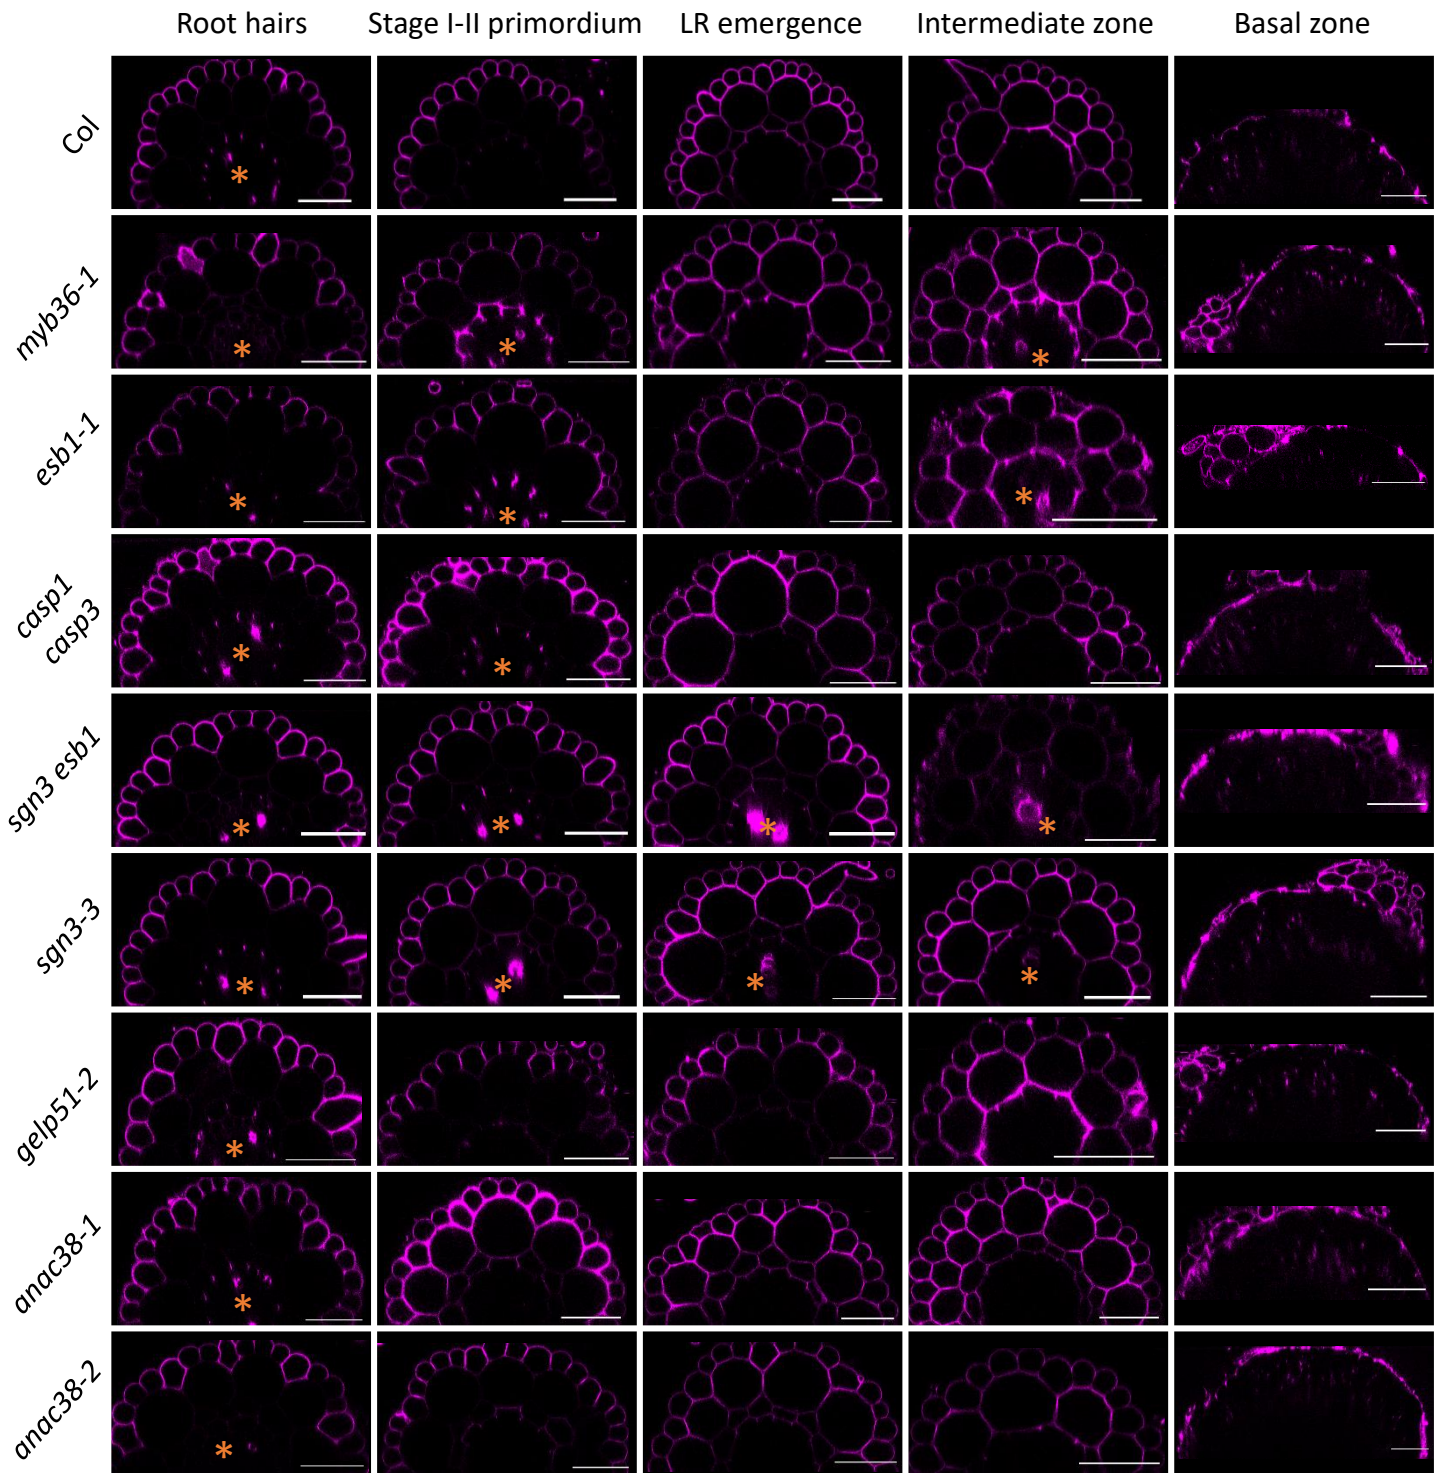

PRIMARY ROOT (continued)

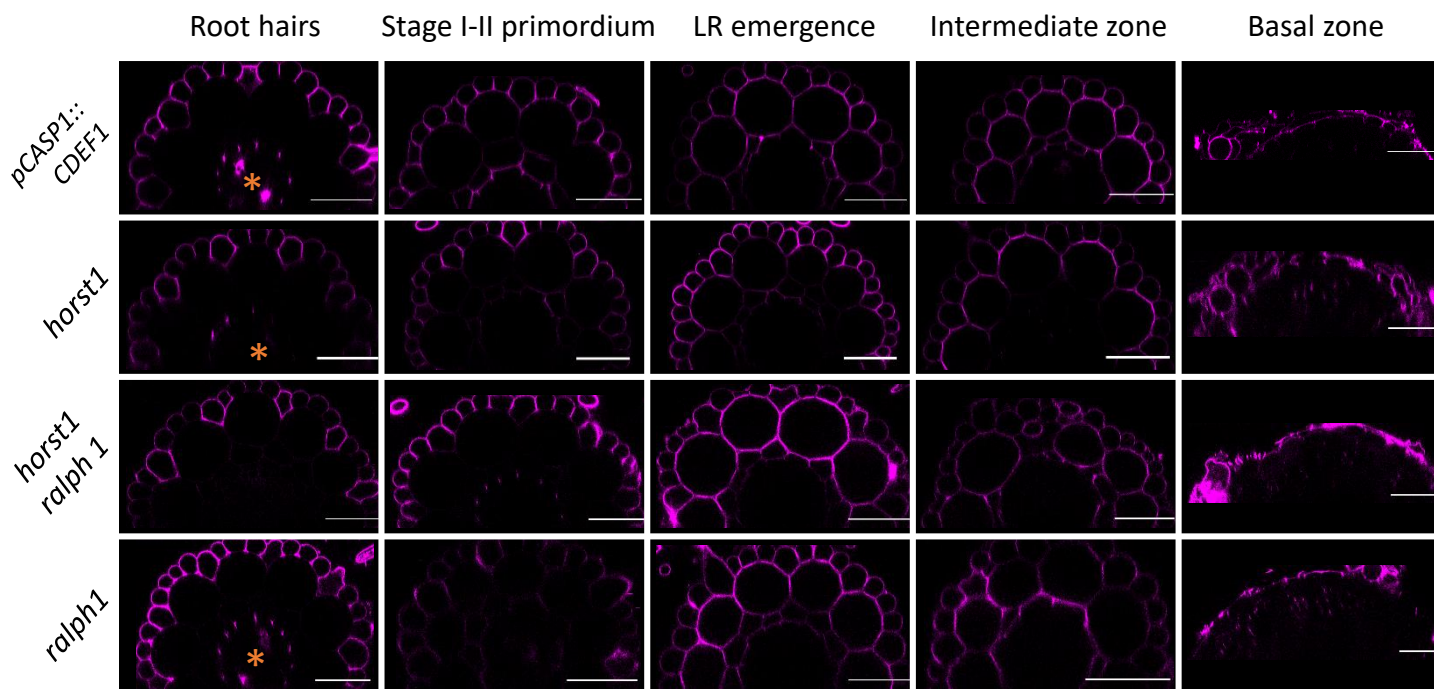

SECONDARY ROOT

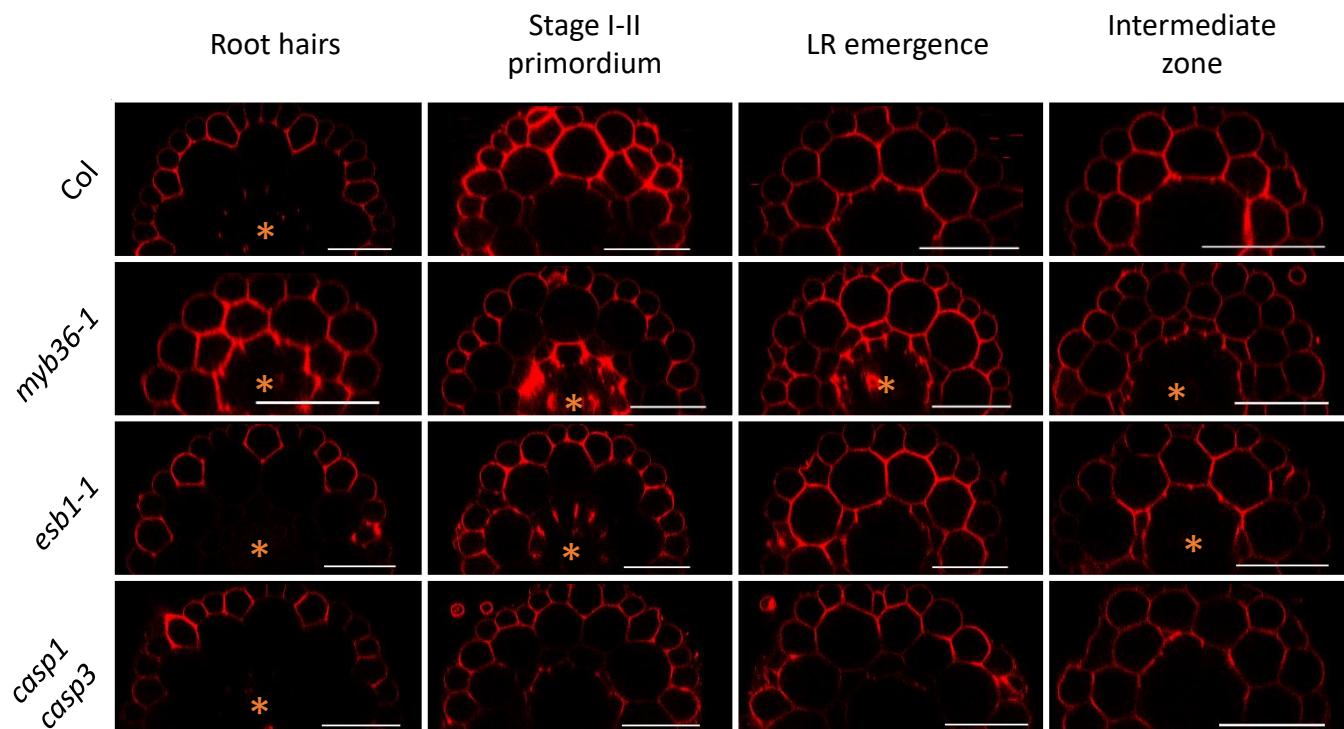

SECONDARY ROOT (continued)

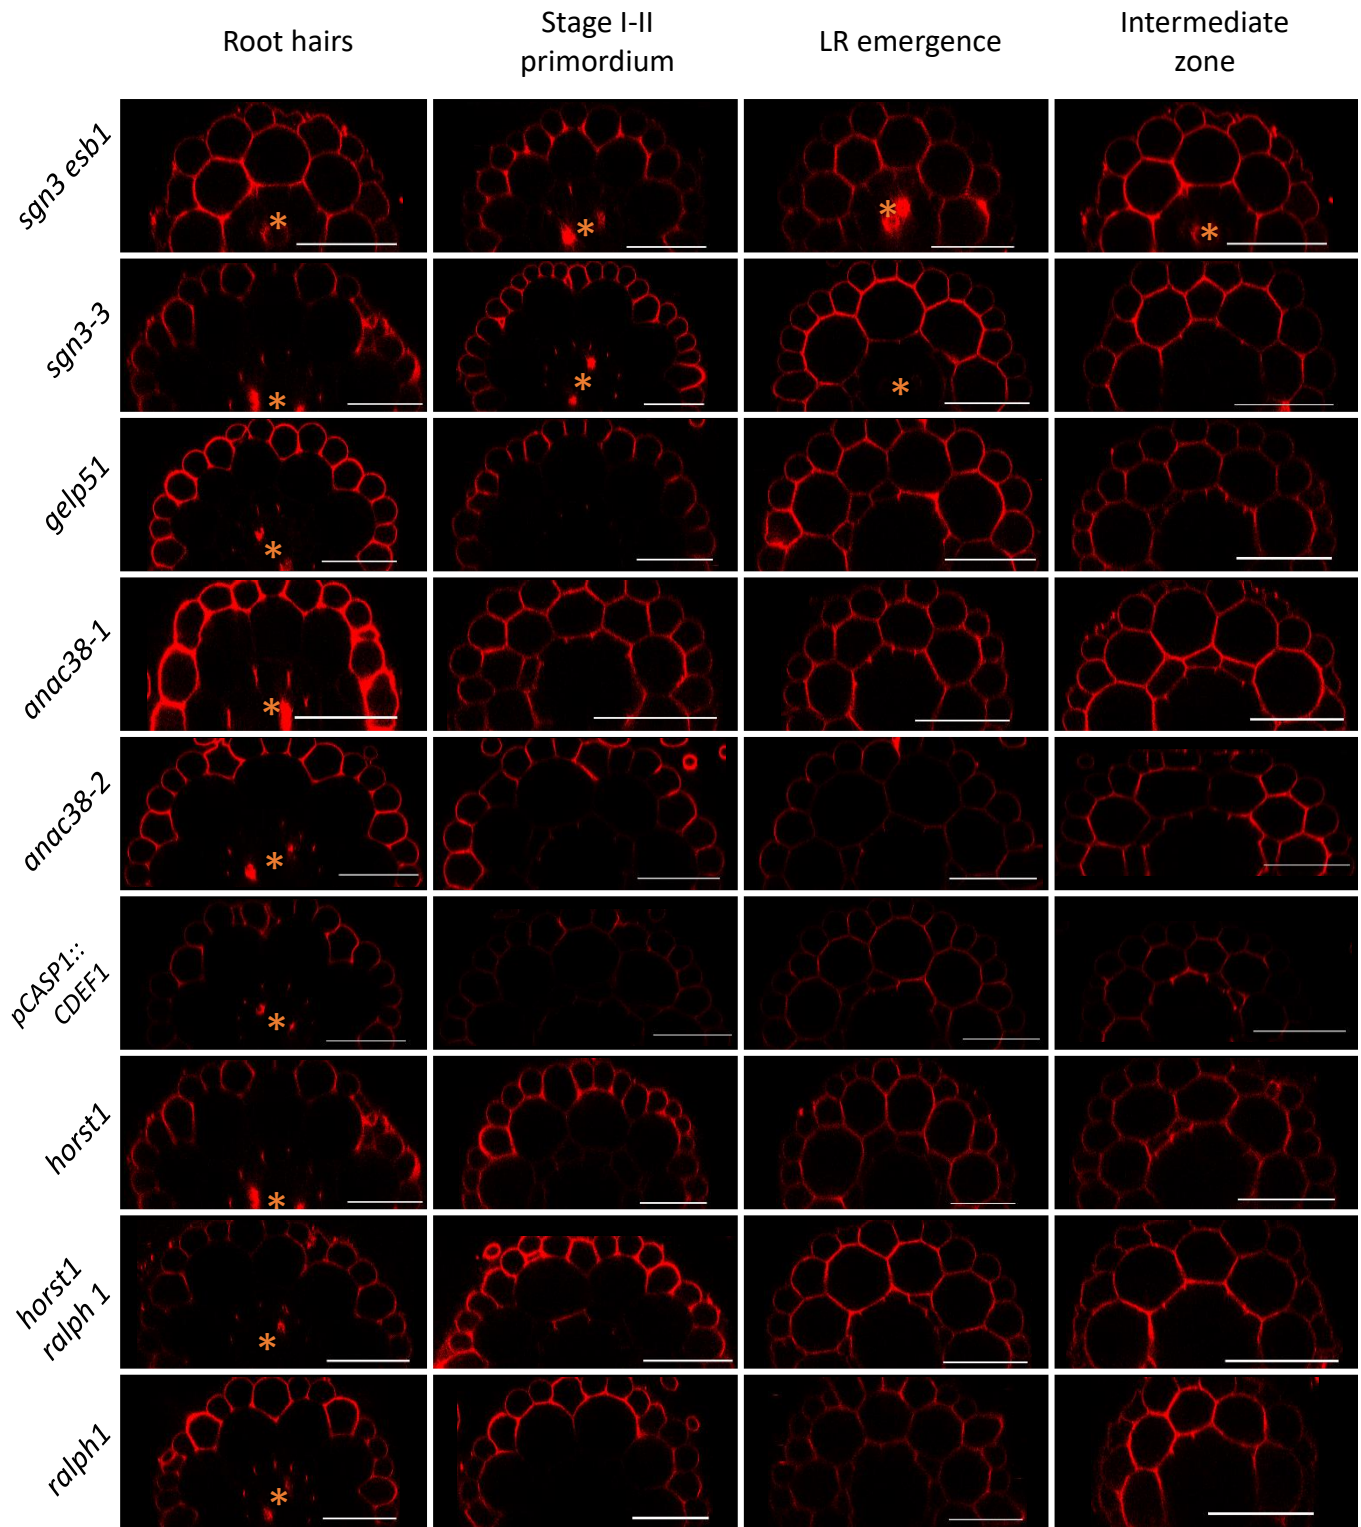

**Fig. S3** Deconvolution of the Auramine O signal in 21d hydroponically grown plants enables the detection and quantification of endodermal and peridermal suberin

a) and b) Reconstitution of a full primary root image of a 21d *Arabidopsis* Col-0 plant grown for 10 days in vitro and 11 days in hydroponic solution, then stained with Auramine O staining, as in Ursache et al., 2018. Image from 44 tiles taken with a stereo-microscope under bright-field light (a) or under UV-light using the GFP filters (b). Lateral roots longer than ~1cm were severed in order to facilitate the observation of the primary root. Scale bar: 10 mm. In b), suberin developmental stages are indicated following the deconvolution of the Auramine O signal explained below.

c) Close-ups from b) showing the various patterns of Auramine O signal, from the root tip to the base. Xylem vessels are marked with an asterisk while the signal attributed to suberin is highlighted by arrowheads. The outlines of suberin are presented in the panel below each picture. Scale bar: 100µm

No suberin: the signal originates only from the xylem vessels,

Around LRP: besides the xylem vessels, a signal located in the endodermis is visible around the lateral root primordium (LRP) emergence,

Patchy: a signal located in the endodermis is visible but discontinuous, xylem vessels can still be observed distinctly,

Continuous: a signal engulfing the stele is observed on top of the xylem vessels. A composite image of this same zone is also shown in i).

Periderm: the auramine O signal covers all the root

d) Confocal observations of the auramine O signal in the stele of roots at the same zones than c). Images were obtained after z-stack reconstitution. Xylem vessels can be distinctly observed and are noted with an asterisk. The pictures confirm the endodermal origin of the other source of signal seen in c), which fills and surrounds the cells. This resembles the staining pattern expected from a suberin lamella covering all endodermal cell surface, very distinct from the band-like, restricted signal in the center of a cell as expected from a lignified Casparian strip. It is highlighted with arrowheads. The outlines of suberin are drawn in the panel below each picture. Scale bar : 50µm

e) Overlay of bright-field and Auramine O signal where epidermal and cortical cells slough off (still visible on the right side). According to Campilho et al. 2020, this position identifies the stage V of periderm development. Scale bar: 100µm

f), g) and h) 3D reconstitution of co-imagings of auramine O and RFP signals from Col plants expressing the suberin synthesis reporter pGPAT5::NLS-RFP construct, in the LRP zone, zone of patchy suberisation, and periderm zone, respectively. A brighter signal in the endodermal cells/periderm cells is associated with the presence of the nuclear RFP signal. In particular, note how a high Auramine O signal is associated to the RFP nuclear localisation on the left side of (f), while almost no signal in both channels occurs on the right side. These observations confirm that the Auramine O signal that can be identified at the endodermis is most probably due to the presence of suberin, and that the patterns observed in (b) can be attributed to the different stages of suberin development.

i) Overlay image of the continuous zone, signals from brightfield and UV/GFP channels. Scale bar: 100µm.

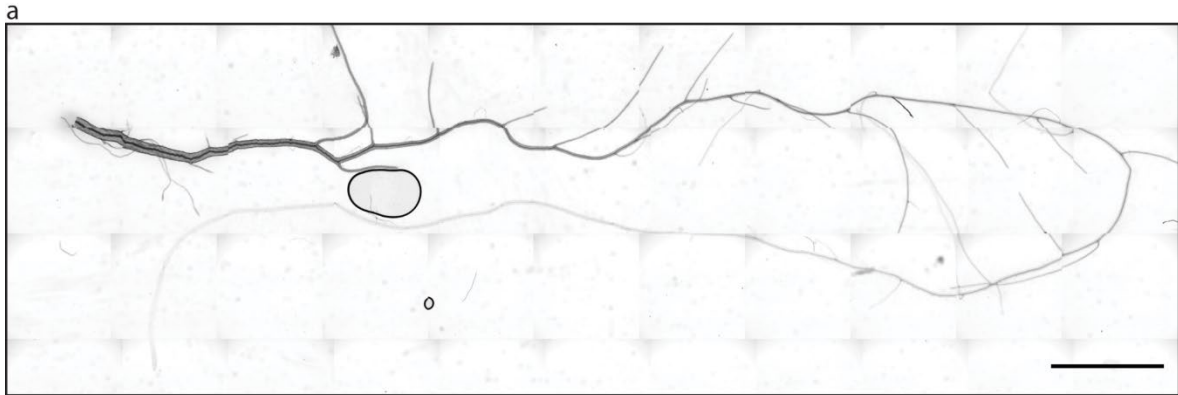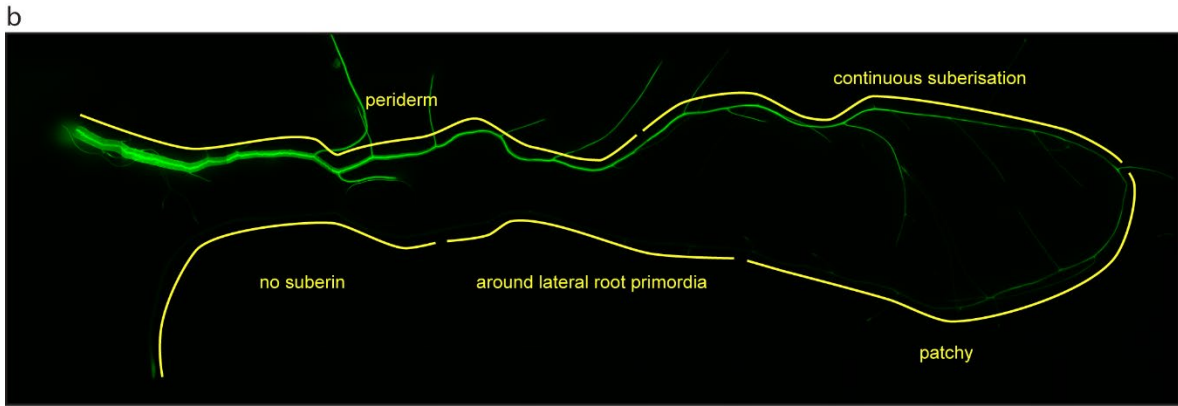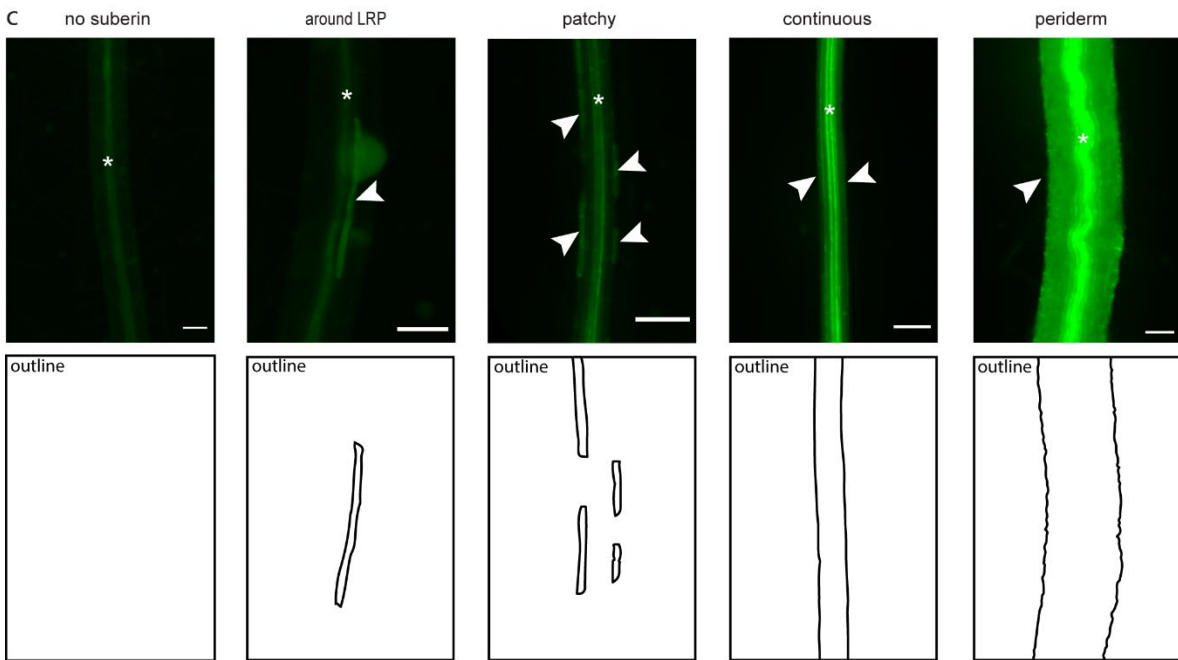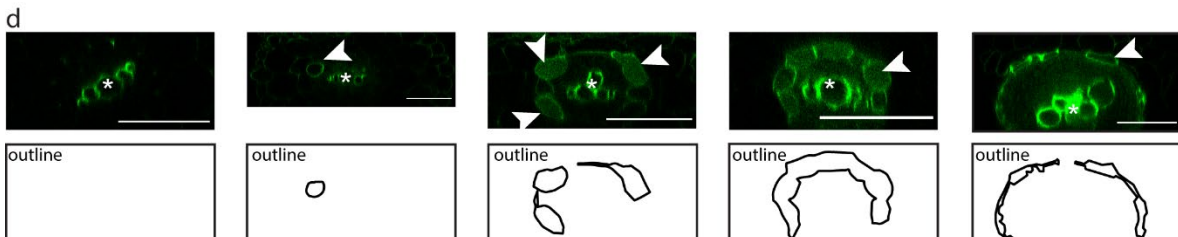

e

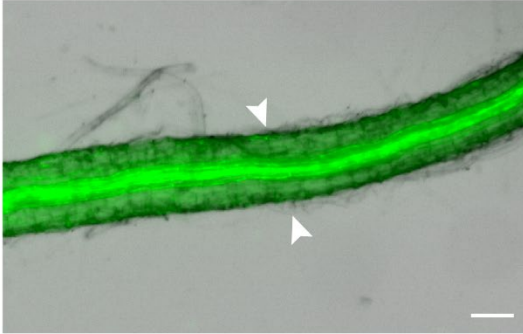

f

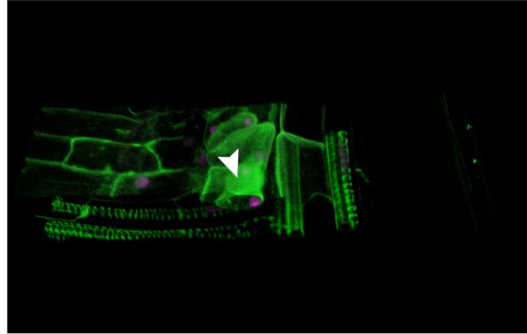

g

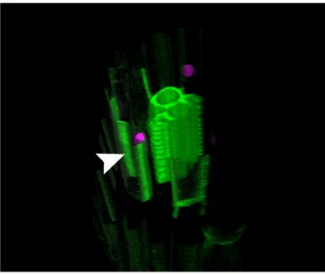

h

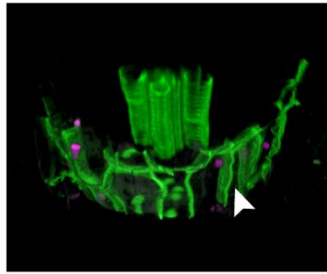

i

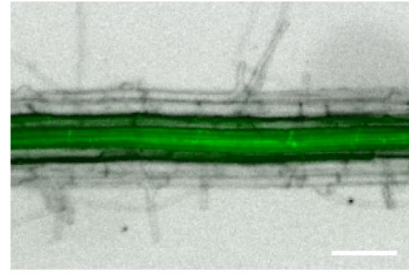

**Fig. S4** Correlations between root hydraulic conductivity ( $L_{p,r-h}$ ) and PIP aquaporins expression levels in the roots of Col-0 and a collection of 7 *Arabidopsis* mutants with alterations in endodermal CS and/or suberin. Complement to Fig. 4. Spearman's correlations were not statistically significant. Plants were grown hydroponically for 19-21 days (N=3), color code similar to main figures.

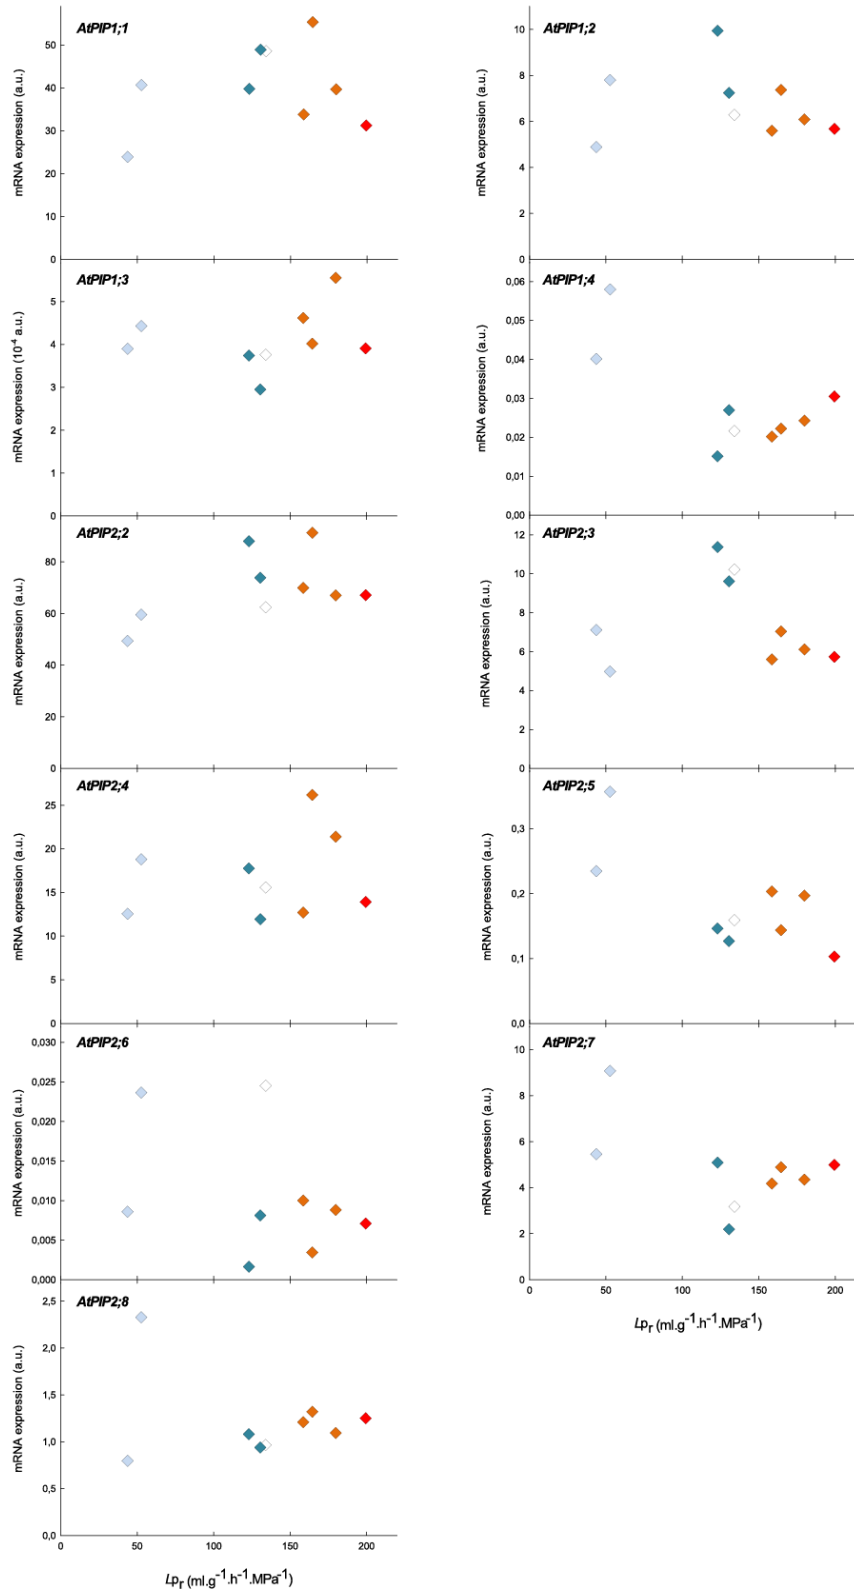



**Fig. S5** Effect of NaCl on the root hydraulic conductivity ( $L_{p_{r-h}}$ ) of Col-0 and of a collection of 16 CS and suberin mutants. Hydroponically grown 21-day-old *Arabidopsis* plants were kept untreated (clear bars) or treated for 1h with 100mM NaCl (hashed bars) before measurement using pressure chambers (means  $\pm$  SE,  $n=15-20$ ,  $N=3$ ). Stars over the bars indicate significant differences among control and salt treatment means (\*  $\alpha < 0.05$ ; \*\*  $\alpha < 0.01$ ; \*\*\*  $\alpha < 0.001$ ).

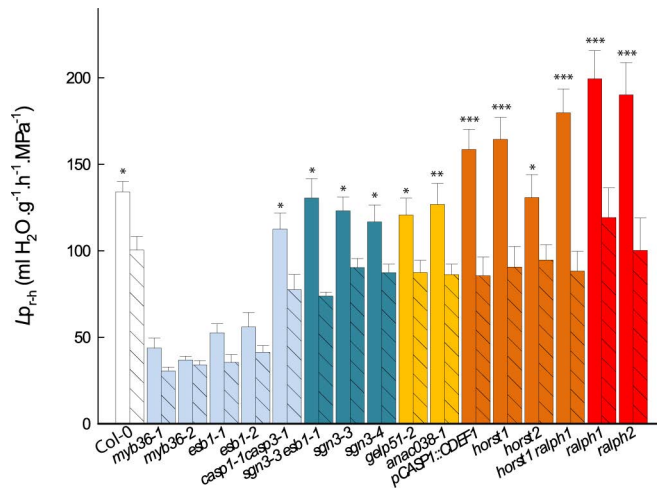

**Fig. S6** Kinetics of rosette development and transpiration rates in Col-0 and in a selection of CS and suberin mutants grown under environmentally controlled conditions. Plants were grown in soil in a Phenopsis platform, (a) kinetic of rosette development and (b) day (clear bars) and night (hashed bars) transpiration rates of five-weeks old plants.

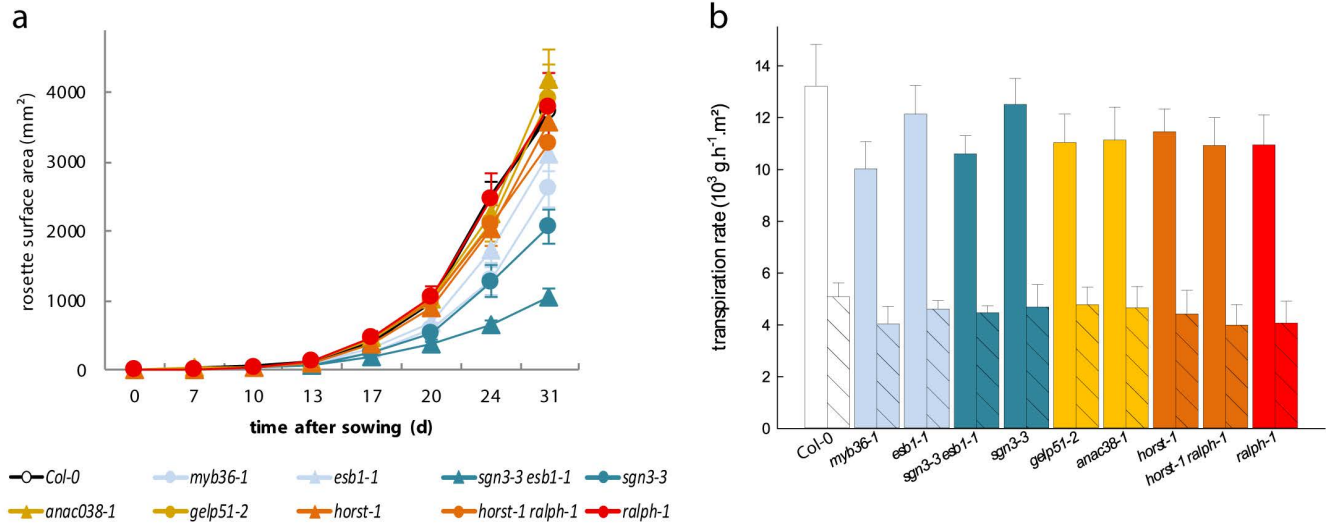

**Table S1** Table summarizing the different mutants analyzed in the present study. *Arabidopsis thaliana* genotypes used in this study, grouped and color-coded according to the results presented in Figure 1 and Figures S2 and S3. All mutant genotypes are in the Col-0 background.

| Plant                  | Original accession           | Type of mutation               | AGI mutated             | Reference                       | Function                                               | Group       |
|------------------------|------------------------------|--------------------------------|-------------------------|---------------------------------|--------------------------------------------------------|-------------|
| Columbia-8 / Col-0     | N60000                       |                                |                         |                                 |                                                        |             |
| <i>myb36-1</i>         | 11250, lwc1                  | Fast neutron promoter mutation | AT5G57620               | Kamiya et al., 2015             | Transcription factor                                   | CS(-)Sub(+) |
| <i>myb36-2</i>         | GK-543B11                    | T-DNA insertion                |                         |                                 |                                                        |             |
| <i>esb1-1</i>          | 14501, dir10                 | Fast neutron promoter deletion | AT2G28670               | Baxter et al., 2009             | Dirigent domain containing protein                     |             |
| <i>esb1-2</i>          | GABI_858D03                  | T-DNA insertion                |                         |                                 |                                                        |             |
| <i>casp1-1 casp3-1</i> | SAIL_265_H05/<br>SALK_011092 | T-DNA insertions               | AT2G36100/<br>AT2G27370 | Roppolo et al., 2011            | Casparian strip membrane domain proteins               |             |
| <i>sgn3-3</i>          | SALK_043282                  | T-DNA insertion                | AT4G20140               | Pfister et al. 2014             | Leucine-rich repeat transmembrane-type receptor kinase | CS(-)Sub(=) |
| <i>sgn3-4</i>          | SALK_064029                  | T-DNA insertion                |                         | Tsuwamoto et al., 2008          |                                                        |             |
| <i>sgn3-3 esb1-1</i>   |                              |                                |                         | Wang, Calvo-Polanco et al. 2019 |                                                        |             |
| <i>anac038-1</i>       | SALK_103716                  | T-DNA insertion                | AT2G24430               | Present work                    | Transcription factor                                   | CS(=)Sub(+) |
| <i>anac038-2</i>       | WiscDsLox_HS007-11H          | T-DNA insertion                |                         | Present work                    |                                                        |             |
| <i>gelp51-2</i>        | GK_016A11                    | T-DNA insertion                | AT2G23540               | Present work                    | GDSL-likeLipase /Acylhydrolase                         |             |
| <i>horst-1</i>         | SALK_107454                  | T-DNA insertion                | AT5G58860               | Höfer et al., 2008              | Cytochrome P450 monooxygenase, CYP86A1                 | CS(=)Sub(-) |
| <i>horst-2</i>         | SALK_104083                  | T-DNA insertion                |                         |                                 |                                                        |             |
| <i>pCASP1::CDEF1</i>   |                              | T-DNA insertion                |                         | Naseer et al., 2012             | Member of the GDSL lipase/esterase family              |             |
| <i>horst-1 ralph-1</i> |                              |                                |                         | Present work                    |                                                        |             |
| <i>ralph-1</i>         | SM.37066                     | Transposon insertion           | AT5G23190               | Compagnon et al., 2009          | Cytochrome P450 monooxygenase, CYP86B2                 | CS(=)Sub(x) |
| <i>ralph-2</i>         | SALK130265                   | T-DNA insertion                |                         |                                 |                                                        |             |



## References

**Baxter I, Hosmani PS, Rus A, Lahner B, Borevitz JO, Muthukumar B, Mickelbart MV, Schreiber L, Franke RB, Salt DE. 2009.** Root Suberin Forms an Extracellular Barrier That Affects Water Relations and Mineral Nutrition in Arabidopsis. *PLoS Genet* **5**: e1000492.

**Campilho A, Nieminen K, Ragni L. 2020.** The development of the periderm: the final frontier between a plant and its environment. *Current Opinion in Plant Biology* **53**: 10–14.

**Compagnon V, Diehl P, Benveniste I, Meyer D, Schaller H, Schreiber L, Franke R, Pinot F. 2009.** CYP86B1 Is Required for Very Long Chain  $\omega$ -Hydroxyacid and  $\alpha,\omega$ -Dicarboxylic Acid Synthesis in Root and Seed Suberin Polyester. *Plant Physiology* **150**: 1831–1843.

**Franke R, Briesen I, Wojciechowski T, Faust A, Yephremov A, Nawrath C, Schreiber L. 2005.** Apoplastic polyesters in Arabidopsis surface tissues – A typical suberin and a particular cutin. *Phytochemistry* **66**: 2643–2658.

**Hofer R, Briesen I, Beck M, Pinot F, Schreiber L, Franke R. 2008.** The Arabidopsis cytochrome P450 CYP86A1 encodes a fatty acid  $\omega$ -hydroxylase involved in suberin monomer biosynthesis. *J. Exp. Bot.* **59**: 2347–2360.

**Kamiya T, Borghi M, Wang P, Danku JMC, Kalmbach L, Hosmani PS, Naseer S, Fujiwara T, Geldner N, Salt DE. 2015.** The MYB36 transcription factor orchestrates Casparian strip formation. *Proceedings of the National Academy of Sciences* **112**: 10533–10538.

**Mustroph A, Zanetti ME, Jang CJH, Holtan HE, Repetti PP, Galbraith DW, Girke T, Bailey-Serres J. 2009.** Profiling transcriptomes of discrete cell populations resolves altered cellular priorities during hypoxia in Arabidopsis. *Proceedings of the National Academy of Sciences* **106**: 18843–18848.

**Naseer S, Lee Y, Lapierre C, Franke R, Nawrath C, Geldner N. 2012.** Casparian strip diffusion barrier in Arabidopsis is made of a lignin polymer without suberin. *Proceedings of the National Academy of Sciences* **109**: 10101–10106.

**Pfister A, Barberon M, Alassimone J, Kalmbach L, Lee Y, Vermeer JE, Yamazaki M, Li G, Maurel C, Takano J, *et al.* 2014.** A receptor-like kinase mutant with absent endodermal diffusion barrier displays selective nutrient homeostasis defects. *eLife* **3**: e03115.

**Roppolo D, De Rybel B, Tendon VD, Pfister A, Alassimone J, Vermeer JEM, Yamazaki M, Stierhof Y-D, Beekman T, Geldner N. 2011.** A novel protein family mediates Casparian strip formation in the endodermis. *Nature* **473**: 380–383.

**Tsuwamoto R, Fukuoka H, Takahata Y. 2008.** GASSHO1 and GASSHO2 encoding a putative leucine-rich repeat transmembrane-type receptor kinase are essential for the normal development of the epidermal surface in Arabidopsis embryos. *The Plant Journal* **54**: 30–42.

**Ursache R, Andersen TG, Marhavý P, Geldner N. 2018.** A protocol for combining fluorescent proteins with histological stains for diverse cell wall components. *The Plant Journal* **93**: 399–412.

**Wang P, Calvo-Polanco M, Reyt G, Barberon M, Champeyroux C, Santoni V, Maurel C, Franke RB, Ljung K, Novak O, et al. 2019.** Surveillance of cell wall diffusion barrier integrity modulates water and solute transport in plants. *Scientific Reports* **9**: 4227.

**Woody ST, Austin-Phillips S, Amasino RM, Krysan PJ. 2006.** The WiscDsLox T-DNA collection: an arabidopsis community resource generated by using an improved high-throughput T-DNA sequencing pipeline. *Journal of Plant Research* **120**: 157–165.
